# Supplementary material
Source: publisher figshare collection journal article supplement (https://wiley.figshare.com/articles/dataset/_/3529958)
Supplement: Supplementary file 1 [file 1 › appendix-B.htm]

Ecological Archives E089-153-A2


### *Ecological Archives* E089-153-A2

### **J. Harte, T. Zillio, E. Conlisk, and A. B. Smith. 2008. Maximum entropy and the state variable approach to macroecology. *Ecology* 89:2700–2711.**

Appendix B. Mathematical details. Click here for a PDF file of the appendix.

---


[Back to E089-153]
